# Supplementary material
Source: publisher site journal article supplement (https://www.spandidos-publications.com/7595/downloadSupplementary)
Supplement: Supplementary file 1 [file downloadSupplementary]

## Sheet: Sheet1
Table SI. Differential expression genes.
Gene	LogFC	P.Value
A1CF	-1.6383	7.04×10^-11
ABAT	-1.31103	1.46×10^-06
ABCC2	-1.14919	5.90×10^-06
ABCC6P2	-1.02548	1.36×10^-06
ABCC9	1.24518	8.07×10^-05
ABI3BP	1.34345	2.36×10^-04
ACAA2	-1.00373	7.70×10^-05
ACADSB	-1.10419	8.12×10^-05
ACAP2-IT1	1.30329	4.92×10^-11
ACE2	-1.0077	1.15×10^-02
ACMSD	-1.82083	1.37×10^-08
ACSM2A	-1.52091	4.65×10^-04
ACSM2B	-1.65222	4.39×10^-04
ACSM5	-1.09114	2.84×10^-10
ACY1	-1.441	4.27×10^-07
ACY3	-1.35045	7.46×10^-08
ADAMTS1	1.19779	4.65×10^-07
ADAMTS5	1.02336	7.19×10^-06
ADH1B	1.54513	9.50×10^-05
ADH6	-1.09114	1.13×10^-05
AEBP1	1.24606	3.83×10^-05
AFM	-1.94776	2.60×10^-05
AGAP6	1.00089	3.27×10^-10
AGAP7	1.02498	6.63×10^-10
AGMAT	-2.38192	1.19×10^-05
AGPAT9	-1.073	2.14×10^-07
AGXT2	-1.40679	1.64×10^-03
AK4	-1.44141	1.98×10^-07
AK4P3	-2.46608	8.39×10^-09
AKR7A2	-1.05149	5.11×10^-12
AKR7A3	-1.54689	1.97×10^-12
ALB	-2.82853	2.13×10^-08
ALDH2	-1.06314	1.56×10^-09
ALDH4A1	-1.48033	2.14×10^-08
ALDH6A1	-1.7122	4.47×10^-07
ALDOB	-1.87797	6.26×10^-05
ALKBH7	-1.02398	6.03×10^-16
ALPL	-1.36075	3.55×10^-10
ANGPTL3	-1.5823	4.55×10^-05
ANKRD10-IT1	1.01417	3.63×10^-05
ANKRD36	1.13727	1.43×10^-11
ANKRD36B	1.05051	2.79×10^-11
ANKS4B	-1.33355	2.67×10^-09
ANPEP	-1.00081	1.32×10^-02
ANXA1	1.05174	6.65×10^-12
ANXA9	-1.11185	9.64×10^-11
AOX1	-1.00078	1.01×10^-03
APLN	-1.08346	3.42×10^-06
APOC1	1.52689	8.71×10^-03
APOH	-1.52552	2.29×10^-06
APOM	-1.77364	1.23×10^-04
AQP7P3	-1.12491	7.81×10^-07
AQP9	-1.27478	8.03×10^-11
ARG2	-1.00493	3.17×10^-09
ARHGAP19	-1.13011	5.50×10^-06
ASPA	-1.25999	1.38×10^-07
ASPN	1.62648	2.00×10^-07
ASS1	-1.12506	2.55×10^-06
ATP13A3	1.35241	2.44×10^-10
ATP6V0D2	-1.06993	5.55×10^-04
ATP6V1G3	-1.30178	4.05×10^-03
BHMT	-1.69054	2.61×10^-04
BHMT2	-1.21738	3.50×10^-04
BLVRB	-1.235	3.74×10^-15
BRE-AS1	-2.46329	3.49×10^-08
BTG2	-1.36827	1.18×10^-11
C11orf54	-1.05041	2.64×10^-05
C14orf164	-1.33927	6.18×10^-09
C19orf77	-1.47053	2.75×10^-03
C1orf192	-1.02561	2.23×10^-08
C1QC	1.54281	5.96×10^-04
C3	1.88387	7.25×10^-04
C7	2.00761	1.59×10^-04
C9orf66	-1.14014	2.69×10^-09
CA2	-1.48631	4.65×10^-11
CACNA1C-AS4	1.01488	4.28×10^-09
CALB1	-1.42828	2.96×10^-04
CCL11	1.11157	1.09×10^-03
CCL18	1.94574	8.09×10^-04
CCL19	1.70858	1.01×10^-03
CCL2	1.56742	8.79×10^-05
CCL21	2.61648	1.19×10^-05
CD248	1.13321	1.59×10^-04
CDH10	-1.76687	3.47×10^-12
CDH6	1.60673	2.53×10^-04
CERS6	-1.08096	1.36×10^-06
CETP	-1.0817	3.85×10^-07
CFH	1.24933	2.00×10^-04
CHI3L1	-1.27019	8.53×10^-04
CKB	-1.27498	7.91×10^-15
CLDN1	1.04464	6.42×10^-03
CLDN8	-1.10799	9.02×10^-04
CLEC4E	-1.42082	1.49×10^-07
CLYBL	-1.05699	5.83×10^-09
CMBL	-1.22525	8.90×10^-09
CMTM2	-1.06953	4.66×10^-12
CNTN1	-1.02546	8.54×10^-07
COL14A1	1.06135	5.00×10^-04
COL1A2	1.45552	1.32×10^-05
COL3A1	1.09608	5.76×10^-04
COL6A3	1.30681	4.73×10^-05
COL8A1	1.55432	3.91×10^-05
COLEC12	1.55085	1.86×10^-03
CPA3	1.11546	9.01×10^-04
CPXM1	-1.49836	1.14×10^-05
CR1	-1.44425	6.05×10^-05
CRABP1	-1.00047	3.18×10^-07
CRYAA	-1.2968	9.88×10^-08
CRYL1	-1.2583	2.65×10^-09
CTH	-1.20433	1.31×10^-08
CTSC	1.01712	1.37×10^-03
CTSL2	-1.24791	3.05×10^-06
CTXN3	-1.88688	2.61×10^-07
CUBN	-1.37636	8.70×10^-03
CX3CL1	-1.01946	1.14×10^-08
CXCR1	-2.02123	5.75×10^-16
CXCR2	-1.99316	2.04×10^-18
CYB5A	-1.23523	2.52×10^-10
CYP27B1	-1.08544	5.81×10^-12
CYP2B6	-1.81443	1.14×10^-09
CYP4A11	-1.8648	7.35×10^-04
CYP4A22	-1.53309	1.29×10^-04
DACH1	-1.20326	4.74×10^-06
DANCR	-1.44793	2.66×10^-16
DAO	-1.36044	6.74×10^-05
DAPL1	1.13991	1.35×10^-03
DCXR	-1.88807	9.63×10^-11
DDC	-1.4173	1.97×10^-05
DDN	-1.02365	1.39×10^-05
DEFA1B	-2.63275	7.93×10^-03
DEFB1	-1.52522	1.99×10^-04
DIO1	-1.01381	2.72×10^-03
DPEP1	-1.24527	4.35×10^-07
DPP6	-1.30802	6.45×10^-07
DPYS	-1.1526	1.37×10^-05
DUSP1	-1.94977	3.21×10^-23
ECH1	-1.24319	8.84×10^-14
ECHS1	-1.44112	6.27×10^-09
ECM1	1.70861	1.26×10^-07
EDNRB	1.00264	4.22×10^-04
EGF	-1.57987	7.75×10^-08
EGOT	-1.1905	1.52×10^-06
EGR1	-2.85436	3.30×10^-08
EHD3	-1.54059	2.03×10^-05
EHHADH	-1.20425	2.95×10^-06
EMP1	1.64597	1.22×10^-10
EPHX2	-1.10761	1.12×10^-07
ERRFI1	-1.88931	7.06×10^-12
ESM1	-2.43685	4.31×10^-09
ETFB	-1.05537	4.85×10^-11
F2RL2	1.05039	3.34×10^-05
FABP1	-1.62732	6.75×10^-07
FABP3	-1.31863	4.36×10^-06
FABP5P1	1.7598	5.12×10^-06
FABP5P7	1.81806	8.46×10^-06
FAM151A	-1.75846	3.71×10^-05
FAM180A	-1.77206	5.16×10^-09
FBLN5	1.61361	7.69×10^-05
FBN1	1.15989	4.59×10^-07
FBP1	-1.88123	4.28×10^-08
FCGR3B	-1.53858	1.38×10^-11
FMN2	-1.27931	1.06×10^-06
FMO1	-1.23982	3.79×10^-03
FMO3	1.14494	5.69×10^-04
FMO4	-1.00019	1.62×10^-03
FN1	3.88849	3.70×10^-09
FOLH1B	-1.3434	2.16×10^-06
FOS	-3.72621	9.85×10^-24
FOXQ1	-1.23612	4.11×10^-04
FPR1	-1.94229	9.41×10^-11
FPR2	-1.0956	5.41×10^-10
FPR3	1.71658	4.46×10^-05
FRY-AS1	-1.38164	8.03×10^-08
FUT6	-1.10516	3.76×10^-06
FXYD1	-1.13699	3.78×10^-09
G0S2	-1.45114	8.83×10^-09
G6PC	-4.65216	3.73×10^-15
GADD45B	-1.06027	2.76×10^-07
GATM	-1.43629	1.13×10^-03
GBA3	-1.5276	8.16×10^-06
GDF15	-1.46038	3.28×10^-11
GIPC2	-1.62167	3.10×10^-07
GK	-1.03144	1.86×10^-04
GLYAT	-2.28267	1.47×10^-05
GLYATL1	-1.99388	8.28×10^-06
GMNC	-1.08953	1.74×10^-08
GOLGA8A	1.15619	1.78×10^-10
GOLGA8B	1.10954	2.27×10^-09
GPR27	-1.03297	7.15×10^-07
GPR34	1.13306	3.57×10^-04
GSTA1	-2.53582	2.30×10^-06
GSTA2	-3.09815	1.46×10^-07
GSTA3	-1.26301	1.14×10^-12
GSTA5	-1.17569	1.78×10^-09
GUCY1A3	1.05508	2.33×10^-09
GUSBP2	1.01541	1.24×10^-10
GUSBP3	1.25092	2.24×10^-11
GUSBP9	1.31831	1.66×10^-10
HAO2	-2.30806	1.88×10^-05
HBA1	-3.34779	5.43×10^-12
HBA2	-2.16989	9.89×10^-10
HBB	-2.39798	1.42×10^-10
HES1	-1.45724	9.75×10^-10
HGD	-1.38602	3.71×10^-05
HIST1H1E	-1.59213	6.81×10^-13
HIST1H2BD	-1.5659	5.18×10^-15
HIST2H2AA4	-2.73685	4.53×10^-18
HIST2H2BE	-1.1982	1.43×10^-09
HNRNPU-AS1	1.2727	1.52×10^-11
HPD	-2.91305	5.84×10^-08
HPGD	-1.53563	9.34×10^-05
HRASLS2	-1.05044	1.82×10^-04
HRSP12	-1.5396	1.30×10^-06
HSD11B2	-1.07973	1.69×10^-03
HSD17B14	-1.9486	1.04×10^-17
HSD17B2	-1.07574	4.31×10^-06
HSPA1A	-1.82914	3.88×10^-16
HSPA1B	-1.91346	2.10×10^-16
HTRA1	-1.04833	1.93×10^-06
IGF1	-1.4477	8.46×10^-03
IGFBP6	1.07834	1.66×10^-05
IGHA1	2.96656	3.34×10^-03
IGHG4	2.80037	2.30×10^-05
IGHJ1	1.1086	1.89×10^-06
IGHJ5	1.92831	2.84×10^-03
IGHV3-21	1.02595	2.55×10^-03
IGHV3-30	1.23269	1.34×10^-02
IGJ	1.49402	8.37×10^-03
IGKC	1.28818	3.80×10^-03
IGKV1-17	1.06782	1.11×10^-02
IGKV1-5	1.00232	1.26×10^-02
IGKV1-6	1.42087	4.25×10^-03
IGKV1-9	1.0599	7.77×10^-03
IGKV1D-16	1.49659	1.42×10^-03
IGKV1D-27	1.78378	5.50×10^-03
IGKV1D-33	1.24375	1.91×10^-03
IGKV1D-39	1.77826	4.08×10^-03
IGKV1D-42	1.08863	1.01×10^-02
IGKV2-28	1.66518	4.81×10^-02
IGKV2D-29	1.02358	2.08×10^-02
IGKV3-11	1.1883	1.09×10^-02
IGKV3D-15	1.36336	6.60×10^-03
IGKV3D-7	1.68284	9.94×10^-03
IGLC7	2.81415	1.87×10^-04
INHBA	1.42211	4.45×10^-05
ITGA11	1.39322	4.71×10^-05
ITGB6	1.0464	3.16×10^-03
JUN	-1.30134	1.28×10^-14
JUNB	-2.16738	9.97×10^-12
KCNJ15	-1.20663	3.41×10^-04
KDR	-1.10737	1.06×10^-04
KHK	-1.16728	6.39×10^-07
KIAA1191	-1.20505	9.63×10^-13
KIRREL-IT1	1.36163	8.48×10^-11
KLF7-IT1	1.09226	1.13×10^-07
KLK1	-1.11335	1.40×10^-03
KNG1	-1.98594	2.33×10^-04
L3MBTL3	-1.07369	1.06×10^-06
LINC00052	-1.19008	1.75×10^-05
LINC00342	1.33826	1.29×10^-11
LINC00948	-1.47712	4.73×10^-07
LOC100131825	1.02713	1.10×10^-03
LOC100190986	2.36616	7.43×10^-15
LOC100272216	1.00675	1.05×10^-09
LOC100287497	1.05839	2.85×10^-07
LOC100303749	1.12335	1.68×10^-07
LOC100505664	-1.21808	5.34×10^-07
LOC100505985	-2.02645	2.13×10^-05
LOC100506060	1.23995	1.09×10^-14
LOC100506123	1.27999	2.64×10^-10
LOC100996266	-1.83221	3.42×10^-07
LOC100996862	1.15642	1.32×10^-10
LOC101060277	-1.56345	2.20×10^-05
LOC284578	-1.03934	1.24×10^-04
LOC440354	1.39086	1.88×10^-15
LOC595101	1.416	3.24×10^-15
LOC613037	1.26882	2.28×10^-14
LOC642799	1.1212	5.81×10^-16
LOC644662	-1.03602	6.27×10^-08
LOC727944	-2.42464	1.26×10^-11
LOC728290	-1.28655	1.29×10^-06
LOX	-1.68485	5.75×10^-08
LPL	-1.34856	1.50×10^-09
LRP2BP	1.11318	1.81×10^-08
LRRC2	-1.24544	8.80×10^-06
LTBP1	1.12203	1.17×10^-07
LUM	3.00221	4.79×10^-07
LUST	1.37546	4.53×10^-12
LYVE1	1.33844	1.55×10^-03
MAGI2-AS1	1.81165	1.34×10^-07
MAOA	-1.19979	4.07×10^-11
MARCKS	1.57871	1.80×10^-05
MED11	-1.10353	1.35×10^-12
METTL7B	-1.23738	4.82×10^-04
MFAP4	1.32514	5.69×10^-05
MGAM	-1.04467	2.53×10^-04
MIOX	-2.58318	2.86×10^-06
MIR103A2	1.57816	1.53×10^-11
MIR103B2	1.54653	1.05×10^-10
MIR1254-1	1.63453	1.81×10^-15
MIR1256	1.68523	1.19×10^-15
MIR1285-2	1.26036	4.54×10^-14
MIR1299	1.27559	1.50×10^-08
MIR186	1.08023	3.05×10^-07
MIR297	1.4893	8.34×10^-12
MIR30A	1.21369	1.51×10^-11
MIR30E	1.04659	3.27×10^-07
MIR3120	1.08958	3.90×10^-07
MIR3671	1.10805	2.46×10^-08
MIR3911	1.78265	6.88×10^-09
MIR3916	1.41149	2.61×10^-06
MIR3975	1.48893	1.71×10^-05
MIR421	1.32963	1.05×10^-06
MIR4256	2.5993	4.21×10^-18
MIR4275	1.00349	3.27×10^-04
MIR4454	1.56584	2.20×10^-13
MIR450B	1.36837	1.06×10^-09
MIR4521	3.21028	2.76×10^-22
MIR503	1.32869	3.58×10^-10
MIR5047	1.97001	6.07×10^-10
MIR548A2	1.61532	8.87×10^-08
MIR548A3	1.6504	4.39×10^-13
MIR548AA2	1.55376	1.63×10^-13
MIR548AC	1.24214	4.06×10^-11
MIR548AD	1.55043	1.94×10^-14
MIR548AI	1.50639	4.03×10^-14
MIR548AJ2	1.40433	5.23×10^-14
MIR548AN	1.23411	2.95×10^-10
MIR548D1	1.36089	1.03×10^-15
MIR548D2	1.60528	4.05×10^-15
MIR548F1	1.4836	3.96×10^-15
MIR548F3	1.26176	1.91×10^-10
MIR548G	1.47236	1.61×10^-15
MIR548H2	1.69889	1.73×10^-11
MIR548H3	1.58885	8.91×10^-09
MIR548H4	1.1833	3.26×10^-11
MIR548I4	1.24047	1.59×10^-04
MIR548K	1.17706	1.03×10^-06
MIR548O2	1.84762	2.37×10^-14
MIR548Q	1.58096	3.93×10^-14
MIR548T	1.77423	6.43×10^-12
MIR548W	1.67124	6.20×10^-10
MIR548X	1.93545	2.15×10^-11
MIR570	1.1137	2.54×10^-07
MIR604	2.04391	3.80×10^-07
MIR612	1.44234	2.04×10^-08
MIR644A	1.69864	5.25×10^-11
MIR95	1.20448	2.17×10^-06
MMP2	1.33131	2.93×10^-06
MMP7	2.32245	4.47×10^-04
MNDA	-1.16655	9.25×10^-05
MORN2	-1.31091	9.38×10^-16
MOXD1	1.99467	1.33×10^-05
MPP5	-1.03458	1.79×10^-05
MRO	-1.29037	1.41×10^-06
MS4A6A	1.32644	6.24×10^-04
MT1F	-1.02565	5.77×10^-07
MT1G	-1.12035	2.56×10^-04
MT1H	-1.44423	2.21×10^-04
MUC13	-1.0609	3.12×10^-02
MXD1	-1.05912	7.24×10^-15
NAIP	1.10765	5.29×10^-10
NAP1L2	-1.09193	1.38×10^-09
NAPSA	-1.13395	3.32×10^-07
NAT8	-1.4626	1.06×10^-03
NAT8B	-1.53209	1.43×10^-04
NEBL-AS1	-1.24106	1.60×10^-16
NELL1	1.43451	6.33×10^-03
NFIL3	-1.29972	7.63×10^-14
NID2	1.06424	1.27×10^-05
NPHS1	-1.50807	6.38×10^-06
NPIPA5	1.01645	4.23×10^-16
NPIPB11	1.30709	1.20×10^-14
NPIPB3	1.25976	8.95×10^-15
NPIPB5	1.29625	3.43×10^-15
NPIPL3	1.34598	1.04×10^-14
NPL	-1.16904	9.38×10^-08
NR4A1	-1.15959	2.75×10^-10
NR4A2	-1.35541	2.34×10^-06
NT5E	1.26713	5.86×10^-06
NUPR1L	-1.01489	3.27×10^-05
OCLM	1.34447	6.51×10^-10
OLFML2B	1.04509	4.43×10^-04
OR2T10	-1.05958	6.01×10^-04
OTTHUMG00000002408	1.20913	4.45×10^-10
OTTHUMG00000002525	1.04969	1.26×10^-08
OTTHUMG00000002710	-1.25651	6.88×10^-07
OTTHUMG00000009791	-2.30418	9.87×10^-08
OTTHUMG00000014129	-1.28737	6.94×10^-05
OTTHUMG00000014749	-1.01178	2.79×10^-03
OTTHUMG00000015002	1.14476	1.42×10^-07
OTTHUMG00000015137	-1.13818	9.76×10^-05
OTTHUMG00000016695	-1.45003	2.71×10^-06
OTTHUMG00000018564	1.33953	1.43×10^-18
OTTHUMG00000018715	-1.05454	4.98×10^-06
OTTHUMG00000019064	1.03137	4.30×10^-06
OTTHUMG00000020112	1.20646	1.13×10^-08
OTTHUMG00000020327	1.0599	5.70×10^-08
OTTHUMG00000035254	1.12379	2.73×10^-03
OTTHUMG00000036063	-1.37822	2.51×10^-06
OTTHUMG00000036478	-1.29274	1.06×10^-07
OTTHUMG00000040386	-1.26118	2.31×10^-05
OTTHUMG00000041417	-1.32446	4.29×10^-06
OTTHUMG00000086917	-1.05367	3.50×10^-05
OTTHUMG00000132691	-1.13328	2.04×10^-06
OTTHUMG00000151782	1.02497	3.37×10^-09
OTTHUMG00000151895	1.13176	2.21×10^-05
OTTHUMG00000152418	1.09993	2.21×10^-07
OTTHUMG00000152506	1.2599	1.01×10^-09
OTTHUMG00000152518	1.14489	3.55×10^-05
OTTHUMG00000154698	1.20836	3.47×10^-15
OTTHUMG00000156955	-1.63472	1.56×10^-06
OTTHUMG00000156977	-1.03489	1.67×10^-04
OTTHUMG00000157034	1.13235	3.00×10^-07
OTTHUMG00000160464	1.73845	4.77×10^-09
OTTHUMG00000160692	-2.35228	3.48×10^-08
OTTHUMG00000160733	1.08454	1.95×10^-07
OTTHUMG00000161212	1.37933	1.77×10^-07
OTTHUMG00000162001	-1.41474	5.15×10^-03
OTTHUMG00000162476	1.20636	5.04×10^-11
OTTHUMG00000162500	-1.42234	1.06×10^-07
OTTHUMG00000162597	1.35365	1.14×10^-10
OTTHUMG00000163252	1.7369	2.94×10^-10
OTTHUMG00000163648	-1.77945	9.38×10^-04
PAH	-2.07516	3.76×10^-05
PAIP2B	-1.0763	1.78×10^-07
PAK1	-1.04678	9.39×10^-07
PBLD	-1.30043	1.89×10^-06
PCBD1	-1.12655	9.94×10^-14
PCDH18	1.03963	2.17×10^-06
PCDHGA10	1.17576	5.81×10^-11
PCK1	-2.00168	1.52×10^-07
PCOLCE2	-1.12356	2.74×10^-06
PDK4	-3.20167	1.82×10^-17
PDZK1	-1.02003	1.28×10^-03
PDZK1IP1	-1.16983	3.96×10^-08
PEPD	-1.3472	3.62×10^-08
PER3	1.12999	1.83×10^-09
PFN1P2	1.74885	7.64×10^-16
PI3	-1.53455	8.49×10^-08
PIPOX	-1.16265	1.46×10^-05
PLCG2	-1.18158	1.33×10^-02
PLG	-1.26676	1.11×10^-04
PLGLA	-1.23634	6.26×10^-05
PLK2	1.09395	1.60×10^-07
POSTN	1.31909	4.42×10^-05
PPBP	-1.36203	9.64×10^-06
PPP1R3C	1.07933	4.35×10^-04
PRAP1	-1.04492	2.28×10^-05
PRINS	1.17774	3.96×10^-12
PRKAR2B	-1.0941	9.36×10^-07
PRODH2	-1.79135	1.08×10^-07
PSAT1	-1.56381	2.26×10^-04
PTGDS	-1.06417	1.26×10^-08
PTGS2	-2.57681	5.54×10^-12
PTH1R	-1.16618	2.64×10^-06
PTN	1.43904	6.24×10^-05
PVALB	-1.33743	1.98×10^-06
RASD1	-1.1993	2.61×10^-07
RASSF9	1.003	2.04×10^-05
RBP5	-1.70936	9.79×10^-06
RERG	1.66482	1.43×10^-04
RERG-IT1	1.21736	5.32×10^-08
RGN	-1.06409	2.76×10^-08
RGS2	-2.03773	6.89×10^-08
RGS5	1.40826	4.01×10^-05
RHCG	-1.16984	5.43×10^-06
RNA5SP187	1.51532	1.16×10^-11
RNA5SP195	3.09948	4.94×10^-15
RNA5SP20	1.507	6.40×10^-09
RNA5SP217	1.24796	5.28×10^-04
RNA5SP229	1.34283	6.02×10^-10
RNA5SP310	2.38149	6.69×10^-11
RNA5SP311	2.8362	4.94×10^-12
RNA5SP312	3.01719	7.63×10^-13
RNA5SP313	3.01719	7.63×10^-13
RNA5SP314	2.8362	4.94×10^-12
RNA5SP315	3.01719	7.63×10^-13
RNA5SP316	2.38149	6.69×10^-11
RNA5SP317	2.8362	4.94×10^-12
RNA5SP320	1.58808	7.23×10^-10
RNA5SP82	1.28938	1.07×10^-06
RNASE6	1.09437	3.07×10^-02
RNF138P1	1.27731	3.27×10^-07
RNF152	-1.73296	1.65×10^-07
RNU4-2	-1.32281	2.35×10^-07
RNU5A-1	-1.01666	2.34×10^-10
RNU5B-1	-1.45559	1.87×10^-11
RNU5D-2P	-1.14924	4.04×10^-07
RNU5E-1	-1.55153	1.02×10^-07
RNU5E-2P	-1.32301	1.27×10^-07
RNU6-3	1.26415	1.44×10^-10
RNU6-38	1.36401	7.01×10^-12
RNU6-45P	1.06677	1.06×10^-07
RNU6-60	1.18875	6.66×10^-08
RNU6-8	1.43453	3.37×10^-11
RNU6-82P	1.03766	4.15×10^-06
RNU6-83P	1.03902	2.24×10^-10
RNU7-10P	1.30487	4.30×10^-08
RNU7-13P	1.13653	6.71×10^-10
RNU7-24P	1.15308	3.11×10^-10
RNU7-29P	1.50773	6.33×10^-13
RNU7-35P	1.16585	1.03×10^-10
RNU7-40P	1.59811	3.90×10^-09
RNU7-45P	1.44701	1.45×10^-11
RNU7-47P	1.14027	7.92×10^-12
RNU7-48P	1.48829	1.06×10^-11
RNU7-53P	1.39817	1.58×10^-12
RNU7-61P	1.20345	5.81×10^-09
RNU7-62P	1.05774	7.23×10^-09
RNU7-7P	1.35752	1.09×10^-11
RNY3P6	1.1005	2.06×10^-05
RPL23AP32	1.27061	1.38×10^-09
RPL36AP33	1.23722	2.45×10^-09
RRAS	-1.01369	1.37×10^-07
S100A12	-2.9509	8.49×10^-13
S100A8	-1.8554	1.86×10^-14
S100A9	-3.22031	1.71×10^-12
SAT2	-1.58356	1.25×10^-12
SBSPON	-1.031	1.73×10^-04
SCARNA7	1.73081	3.92×10^-07
SELL	-1.17467	1.99×10^-07
SERPINF1	1.14211	8.56×10^-04
SFRP2	3.53813	6.07×10^-06
SLC12A3	-2.31055	4.29×10^-06
SLC13A1	-1.07557	1.54×10^-02
SLC13A3	-1.60329	3.10×10^-04
SLC17A1	-1.13165	5.58×10^-03
SLC22A6	-1.22985	4.56×10^-03
SLC22A8	-1.36211	1.84×10^-03
SLC27A2	-1.06317	8.26×10^-03
SLC2A2	-1.16472	1.13×10^-04
SLC34A1	-1.10848	1.26×10^-02
SLC36A2	-1.72817	2.25×10^-05
SLC47A1	-1.09708	1.32×10^-03
SLC4A4	-1.32091	2.54×10^-03
SLC5A12	-1.54356	3.41×10^-03
SLC5A2	-1.0275	1.43×10^-07
SLC6A13	-1.13237	1.01×10^-05
SLC6A19	-1.71424	2.32×10^-05
SLC6A6	1.29054	8.37×10^-10
SLC7A5P2	1.57939	2.37×10^-15
SLC7A7	-1.51737	2.34×10^-08
SLC7A8	-1.33785	8.14×10^-07
SLC7A9	-1.33829	3.91×10^-04
SLIT3	1.33861	1.26×10^-08
SMA4	1.22216	1.37×10^-09
SMA5	1.42492	3.22×10^-11
SMCO3	-1.73099	2.24×10^-10
SMG1P1	1.63208	2.34×10^-15
SMIM2-AS1	-1.24135	1.80×10^-08
SNORA12	-1.42446	7.55×10^-08
SNORA22	-1.76016	7.06×10^-09
SNORA47	-1.12215	4.11×10^-09
SNORA48	-1.80344	1.99×10^-07
SNORA70G	1.57763	1.66×10^-08
SNORD105B	-1.11909	3.46×10^-10
SNORD13	-1.04989	5.10×10^-03
SNORD14D	-1.30725	1.28×10^-06
SNORD14E	-1.43341	2.13×10^-05
SNORD3A	-2.9412	4.27×10^-17
SNORD3B-1	-3.01914	6.21×10^-18
SNORD3B-2	-3.01914	6.21×10^-18
SNORD3C	-2.89311	7.28×10^-18
SNORD3D	-2.96518	2.04×10^-18
SNORD41	-1.44987	2.65×10^-06
SNORD59B	-1.29725	6.74×10^-05
SNORD63	1.15233	1.55×10^-05
SNORD66	-1.96707	2.32×10^-13
SNORD7	1.25641	1.40×10^-07
SNORD75	1.00118	7.92×10^-06
SNORD99	1.01138	5.93×10^-04
SORD	-1.34696	2.80×10^-07
SOST	-1.08697	3.62×10^-04
SPDYE1	1.11201	2.52×10^-12
SPDYE2	1.42802	7.67×10^-12
SPDYE3	1.10474	5.22×10^-14
SPDYE5	1.01259	2.71×10^-11
SPDYE6	1.5321	4.65×10^-12
SPDYE8P	1.04401	4.19×10^-13
SST	-1.1707	1.28×10^-03
SVEP1	1.07701	1.41×10^-04
SYT11	1.05525	7.04×10^-06
SYTL2	1.18481	5.22×10^-05
TAS2R30	1.01361	1.97×10^-08
TCF21	-1.17878	2.30×10^-05
TGFB2	1.03319	2.20×10^-05
TGFBI	1.08041	2.14×10^-06
TGFBR3	-1.02465	2.10×10^-06
THRB-IT1	1.20742	5.12×10^-09
TM4SF5	-1.5692	5.45×10^-06
TMEM150C	-1.80379	8.77×10^-10
TMEM174	-1.87293	4.78×10^-04
TMEM178A	-1.00825	2.07×10^-04
TMEM207	-1.11161	1.52×10^-04
TMEM244	-1.0758	2.45×10^-04
TMEM27	-1.19318	7.89×10^-03
TMEM52B	-1.39092	2.20×10^-03
TNC	1.37423	7.55×10^-05
TNNI1	-1.5209	4.82×10^-06
TPM1	1.11233	3.83×10^-08
TPPP3	-1.46741	9.77×10^-09
TREM1	-1.22132	9.44×10^-11
TST	-1.02081	1.27×10^-11
TYRO3	-1.10285	1.65×10^-04
UGT2B10	-1.17974	4.12×10^-05
UGT2B7	-1.57618	6.62×10^-04
UMOD	-1.76609	2.89×10^-03
USH1C	-1.08248	6.38×10^-08
USP2	-1.21468	1.58×10^-05
VASN	-1.20934	3.37×10^-08
VCAN	2.06705	3.70×10^-04
VCAN-AS1	2.45889	6.46×10^-04
VEGFC	1.23418	3.35×10^-07
VNN2	-1.45722	9.24×10^-13
VSIG4	1.15746	5.63×10^-04
VTRNA1-3	2.57771	9.88×10^-16
VTRNA2-1	1.65976	3.18×10^-04
WDR49	-1.3691	2.52×10^-05
WDR72	-1.41546	1.13×10^-05
XPNPEP2	-1.59696	1.84×10^-04
ZBTB20-AS2	1.41608	3.07×10^-07
ZFP36	-3.21956	2.45×10^-15
ZNF638-IT1	1.09586	1.43×10^-07
